# Supplementary material for: Proof of concept: temperature-sensing waders for environmental sciences
Source: Copernicus journal article supplement (doi:10.5194/gi-5-45-2016), 2016-02-29
Supplement: Supplementary file 1 [file gi-5-45-2016-supplement.zip]

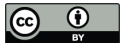

## *Supplement of*

# **Proof of concept: temperature-sensing waders for environmental sciences**

**Rolf Hut et al.**

*Correspondence to:* Rolf Hut ([r.w.hut@tudelft.nl](mailto:r.w.hut@tudelft.nl))

- gi-5-45-2016-supplement-title-page.pdf
- 20150701waderCalibartionIceWaterEmptyBoot.asc
- 20150701waderCalibartionIceWaterFootBoot.asc
- 20150701waderCalibartionNormalWaterFootBoot.asc
- 20150701waderCalibartionNormalWaterNoBoot.asc
- 20150701waderCalibartionWarmWaterFootBoot.asc
- 20150701waderCalibartionWarmWaterNoBoot.asc
- 20150706waderFieldWorkExperiment0.asc
- 20150706waderFieldWorkExperiment0manual.asc
- 20150706waderFieldWorkExperiment1.asc
- 20150706waderFieldWorkExperiment1manual.asc
- 20150706waderFieldWorkExperiment2.asc
- 20150706waderFieldWorkExperiment2a.asc
- 20150706waderFieldWorkExperiment2amanual.asc
- 20150706waderFieldWorkExperiment2b.asc
- 20150706waderFieldWorkExperiment2bmanual.asc
- 20150706waderFieldWorkExperiment2manual.asc
- 20150706waderFieldWorkExperimentFinal.asc
- 20150706waderFieldWorkExperimentFinalManual.asc
- 20150709waderCalibration.asc
- 20150709waderCalibration1.csv

- 20150709waderCalibration2.csv
- 20150709waderCalibrationAddingWarmWater.asc
- 20150709waderCalibrationBackUp.csv
- 20150709waderCalibrationColdWater.asc
- 20150709waderCalibrationIceWater.asc
- 20150709waderCalibrationNormalWater.asc
- 20151028waderFlumTestFile.asc
- 20151028waderFlumeEx1\_LowFlow\_NoFoot.asc
- 20151028waderFlumeEx2\_LowFlow\_Foot.asc
- 20151028waderFlumeEx3\_MediumFlow\_Foot.asc
- 20151028waderFlumeEx4\_MediumFlow\_NoFoot.asc
- 20151028waderFlumeEx5\_HighFlow\_NoFoot.asc
- 20151028waderFlumeEx6\_HighFlow\_Foot.asc
- Rehbock\_Stuw\_v3.m
- analyseFieldData.m
- analyseFlumData.m
- calibrateWaders.m
- calibrationsConstants.mat
- expDown.m
- expUp.m
- experimentMetaData.asc
- figs
  - .DS\_Store
  - fieldWork.eps
- steinharthart.m
- waderCalibration1WarmBath.csv
- waderCalibration2WarmBath.csv
- waderCalibration3WarmBath.csv
- waderCalibration4IceBath.csv
- waderCalibration5IceBath.csv
- waderCalibration6IceBath.csv

The copyright of individual parts of the supplement might differ from the CC-BY 3.0 licence.
